# Supplementary material
Source: HighWire-hosted journal article supplement (https://jnm.snmjournals.org/highwire/filestream/95290/field_highwire_adjunct_files/0/205575_Supplemental_Data.pdf)
Supplement: 205575_Supplemental_Data.pdf [file 205575_Supplemental_Data.pdf]

**Supplemental Table 1. (Photo)physical properties of the three unconjugated dyes.**

|                                                                       | <b>Cy3-(SO<sub>3</sub>)Methyl-COOH</b> | <b>Cy5-(SO<sub>3</sub>)Methyl-COOH</b> | <b>Cy7-(SO<sub>3</sub>)Methyl-COOH</b> |
|-----------------------------------------------------------------------|----------------------------------------|----------------------------------------|----------------------------------------|
| $\epsilon$ in PBS ( $M^{-1}\cdot cm^{-1}$ )                           | $1.3 \cdot 10^5$                       | $2.1 \cdot 10^5$                       | $1.6 \cdot 10^5$                       |
| $\epsilon$ in 200 mg/mL albumin in water ( $M^{-1}\cdot cm^{-1}$ )    | $1.3 \cdot 10^5$                       | $1.8 \cdot 10^5$                       | $1.7 \cdot 10^5$                       |
| $\lambda_{ex}/\lambda_{em}$ in H <sub>2</sub> O and PBS (stoke shift) | 545/560 (15nm)                         | 641/660 (19nm)                         | 741/769 (28nm)                         |
| $\lambda_{ex}/\lambda_{em}$ in 200 mg/ml albumin (stoke shift)        | 556/570 (14nm)                         | 648/665 (17nm)                         | 755/769 (14nm)                         |
| $\Phi_F$ in PBS                                                       | 1 % <sup>a</sup>                       | 13 % <sup>b</sup>                      | 9 % <sup>c</sup>                       |
| $\Phi_F$ in 200 mg/mL albumin                                         | 9 % <sup>d</sup>                       | 28 % <sup>d</sup>                      | 14 % <sup>d</sup>                      |
| Relative brightness (PBS/albumin) to Cy3                              | 1 / 1                                  | 15/ 4                                  | 8 / 2                                  |
| Calculated log D <sup>e</sup>                                         | 1.50                                   | 2.02                                   | 2.55                                   |

a) Relative quantum yield compared to Cy3-(SO<sub>3</sub>)COOH-(SO<sub>3</sub>)COOH in PBS ( $\Phi_F = 4\%$ ), b) Relative quantum yield compared to Cy5-(SO<sub>3</sub>)COOH-(SO<sub>3</sub>)COOH in PBS ( $\Phi_F = 27\%$ ). c) Relative quantum yield compared to Cy7-(SO<sub>3</sub>)Et-(SO<sub>3</sub>)COOH in PBS ( $\Phi_F = 13\%$ ). d) Relative increase in total fluorescence compared to the  $\Phi_F$  measured in PBS, hereby the solvent refractivity was not taken into account, e) Calculated for pH 7.4 with MarvinSketch (ChemAxon, Hungary) 15.11.9 using the consensus approach.

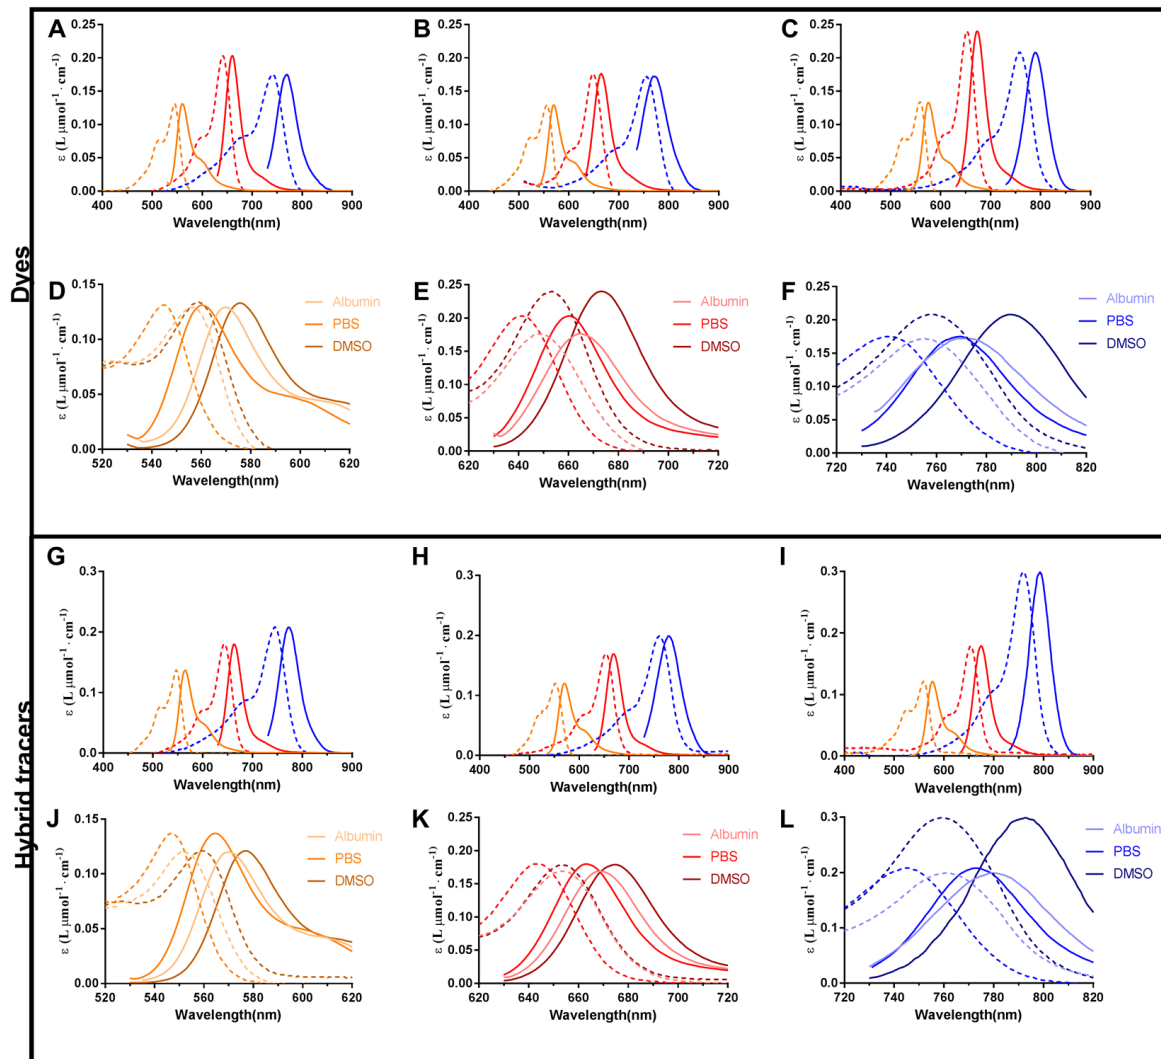

**Supplemental Fig. 1. Absorption and emission of the fluorescent dyes and hybrid tracers.** Absorption (dotted line) and emission graphs (solid line) of Cy3-(SO<sub>3</sub>)Methyl-COOH (orange), Cy5-(SO<sub>3</sub>)Methyl-COOH (red) and Cy7-(SO<sub>3</sub>)Methyl-COOH (blue) in A) PBS, B) Albumin and C) DMSO. Overview of differences per dye in Albumin, PBS and DMSO for D) Cy3-(SO<sub>3</sub>)Methyl-COOH, E) Cy5-(SO<sub>3</sub>)Methyl-COOH and E) Cy7-(SO<sub>3</sub>)Methyl-COOH. Absorption (dotted line) and emission graphs (solid line) of DTPA-Cy3-(SO<sub>3</sub>)Methyl-COOH-c[RGDyK] (orange), DTPA-Cy5-(SO<sub>3</sub>)Methyl-COOH-c[RGDyK] (red) and DTPA-Cy7-(SO<sub>3</sub>)Methyl-COOH-c[RGDyK] (blue) in A) PBS, B) Albumin and C) DMSO. Overview of differences per hybrid tracer in Albumin, PBS and DMSO for D) DTPA-Cy3-(SO<sub>3</sub>)Methyl-COOH-c[RGDyK], E) DTPA-Cy5-(SO<sub>3</sub>)Methyl-COOH-c[RGDyK] and E) DTPA-Cy7-(SO<sub>3</sub>)Methyl-COOH-c[RGDyK].

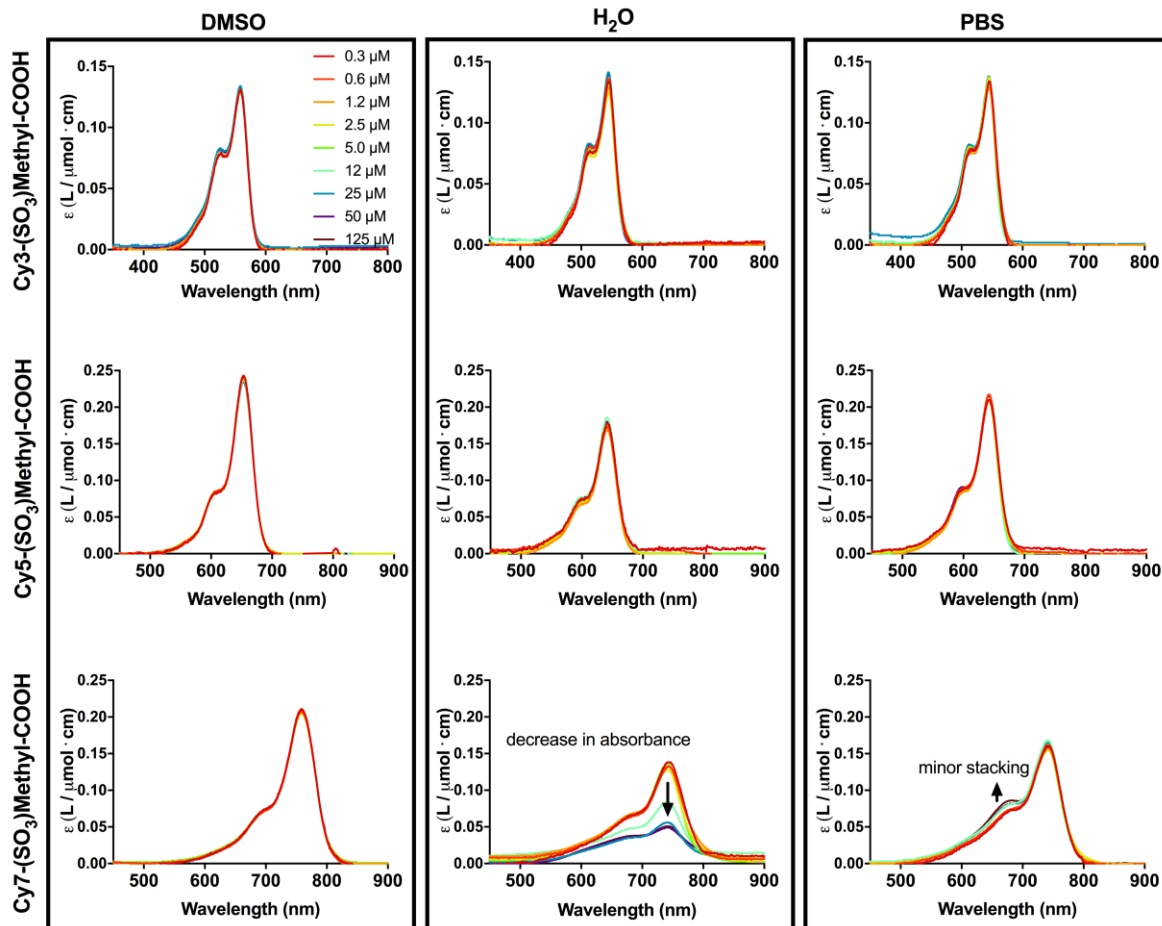

**Supplemental Fig. 2. Absorption spectrometry of the fluorescent dyes.** Concentration-normalized absorption spectra of Cy3-(SO<sub>3</sub>)Methyl-COOH (top), B) Cy5-(SO<sub>3</sub>)Methyl-COOH (middle) and C) Cy7-(SO<sub>3</sub>)Methyl-COOH (bottom) in DMSO, H<sub>2</sub>O and PBS.

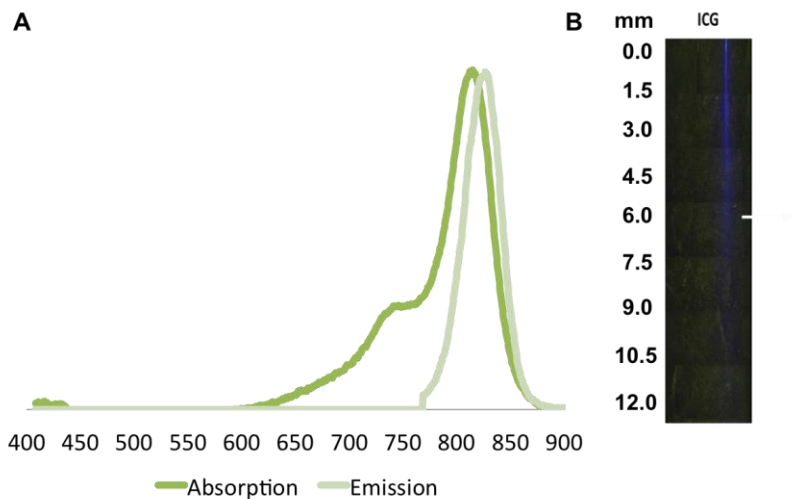

**Supplemental Fig.3. Photophysical properties and tissue penetration of Indocyanine Green (ICG).** A) Absorption and emission spectra of ICG in 200 mg/mL albumin in water. B) Tissue penetration of ICG, diluted in albumin and measured with a clinical-grade laparoscopic fluorescence camera system.

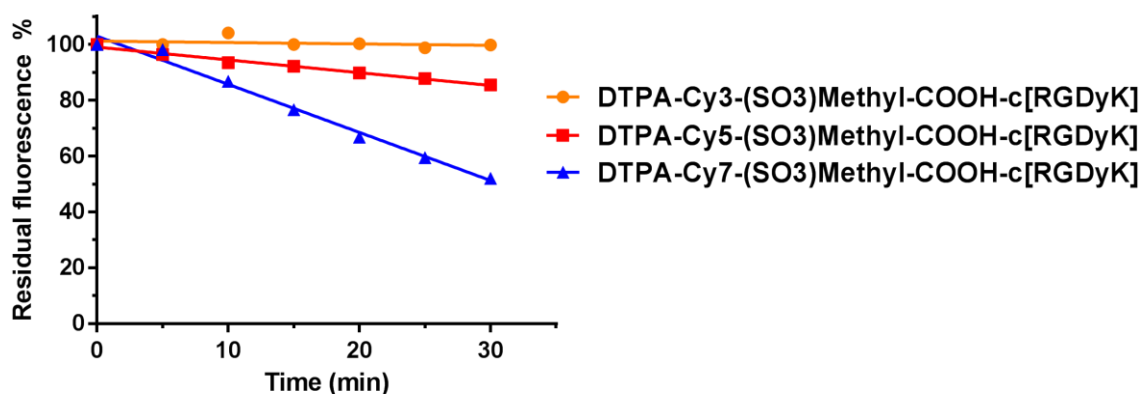

**Supplemental Fig. 4. Photo stability of the hybrid tracers.** The decrease in fluorescence of DTPA-Cy3-(SO<sub>3</sub>)Methyl-COOH-c[RGDyK] (orange), DTPA-Cy5-(SO<sub>3</sub>)Methyl-COOH-c[RGDyK] (red) and DTPA-Cy7-(SO<sub>3</sub>)Methyl-COOH-c[RGDyK] (blue) observed during fluorescent exposure of the tracers using a clinical grade fluorescence laparoscope.

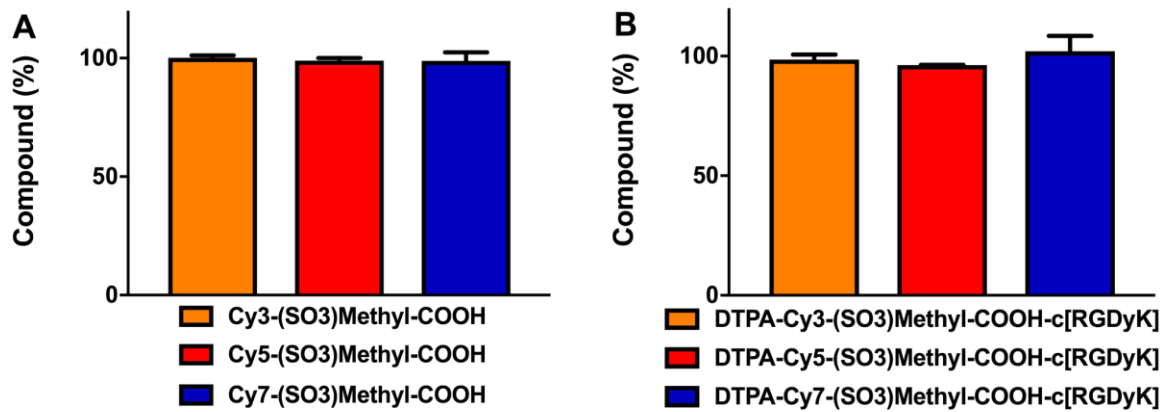

**Supplemental Fig. 5. Stability of the dyes and hybrid tracers towards glutathione.** Stability of the dyes (A) and hybrid compounds (B) in 0.5 mM glutathione in HEPES (pH 7.4) at 37 °C measured by HPLC at t = 6 hours. With Cy3-(SO<sub>3</sub>)Methyl-COOH and DTPA-Cy3-(SO<sub>3</sub>)Methyl-COOH-c[RGDyK] in orange, Cy5-(SO<sub>3</sub>)Methyl-COOH and DTPA-Cy5-(SO<sub>3</sub>)Methyl-COOH-c[RGDyK] in red, and Cy7-(SO<sub>3</sub>)Methyl-COOH and DTPA-Cy7-(SO<sub>3</sub>)Methyl-COOH-c[RGDyK] in blue.

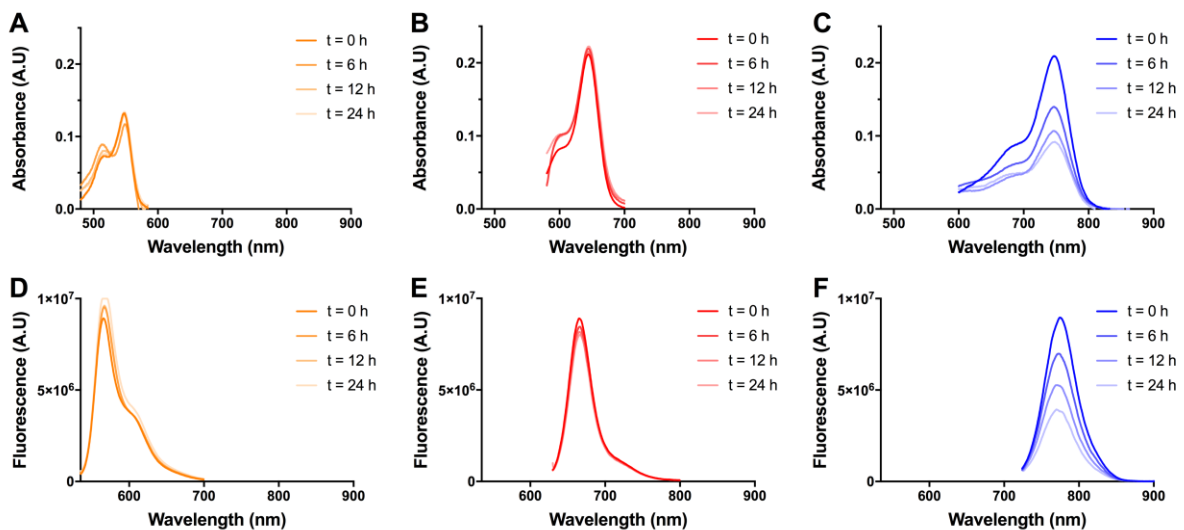

**Supplemental Fig. 6. Serum stability of hybrid constructs.** Assessment of stability using absorbance of (1 μM) of A) DTPA-Cy3-(SO<sub>3</sub>)Methyl-COOH-c[RGDyK] (orange), B) DTPA-Cy5-(SO<sub>3</sub>)Methyl-COOH-c[RGDyK] (red) and C) DTPA-Cy7-(SO<sub>3</sub>)Methyl-COOH-c[RGDyK] (blue) in bovine serum at 37 °C over time. B) Assessment of stability using fluorescence over time of D) DTPA-Cy3-(SO<sub>3</sub>)Methyl-COOH-c[RGDyK], E) DTPA-Cy5-(SO<sub>3</sub>)Methyl-COOH-c[RGDyK] and F) DTPA-Cy7-(SO<sub>3</sub>)Methyl-COOH-c[RGDyK].

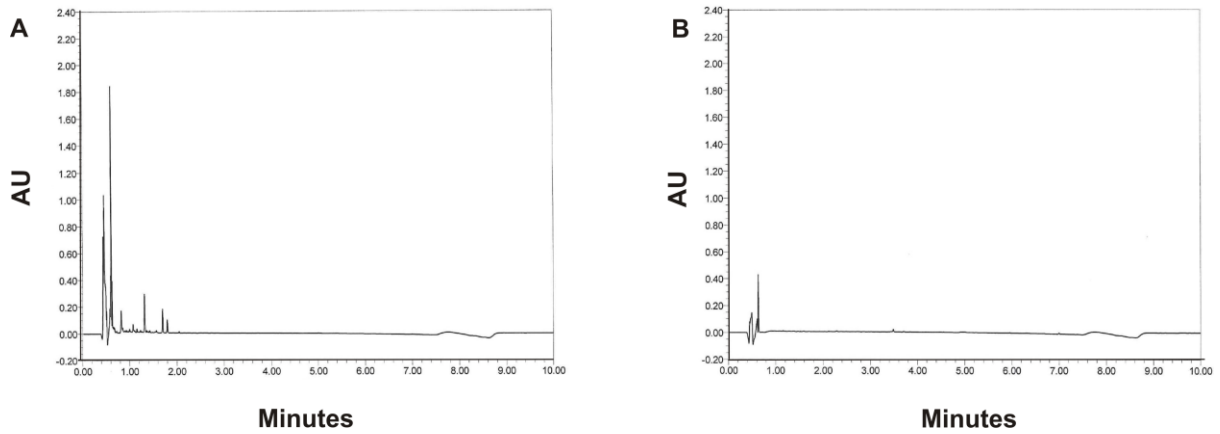

**Supplemental Fig. 7.** UPLC chromatogram of DTPA-Cy7-(SO<sub>3</sub>)Methyl-COOH-c[RGDyK]. A) PBS sample and B) filtrate after one time washing with water of the serum sample.

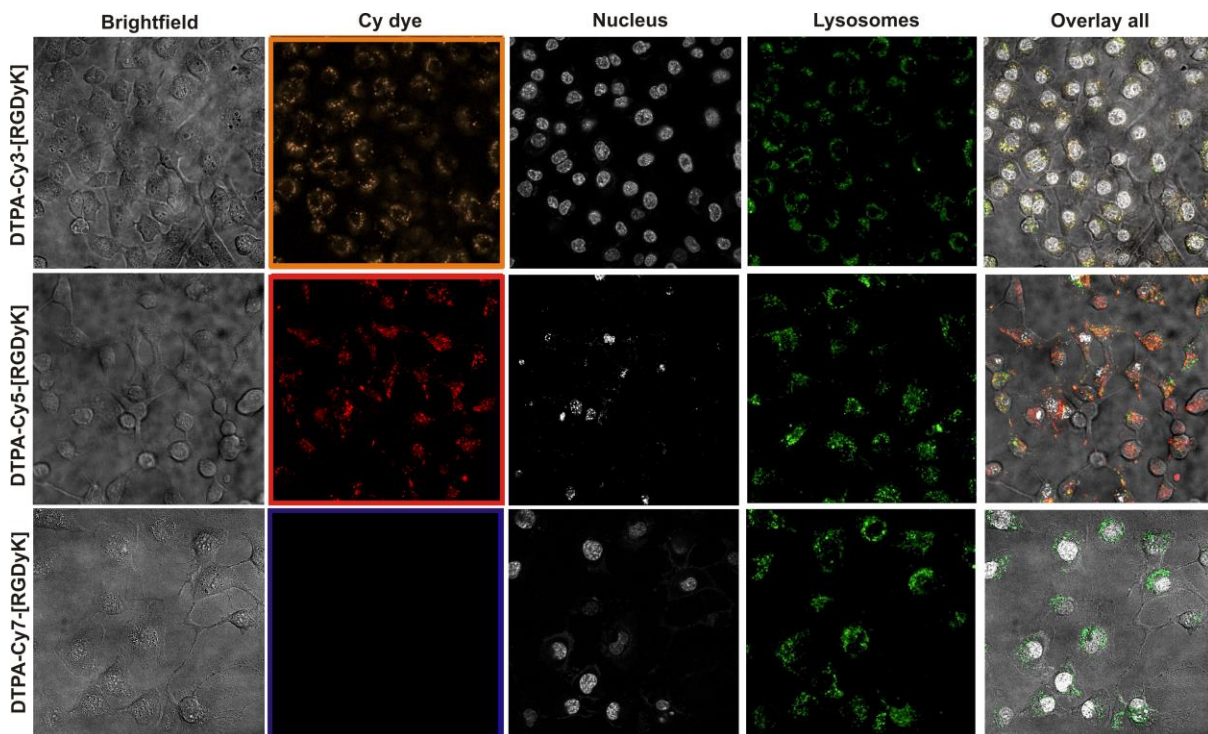

**Supplemental Fig. 8. Fluorescence confocal imaging.** Fluorescence confocal images of GE $\beta$ 3 cells after incubation with DTPA-Cy3-(SO<sub>3</sub>)Methyl-COOH-c[RGDyK] (DTPA-Cy3-(SO<sub>3</sub>)Methyl-COOH-c[RGDyK]; in orange), DTPA-Cy5-(SO<sub>3</sub>)Methyl-COOH-c[RGDyK] (DTPA-Cy5-(SO<sub>3</sub>)Methyl-COOH-c[RGDyK]; in red) or DTPA-Cy7-(SO<sub>3</sub>)Methyl-COOH-c[RGDyK] (DTPA-Cy7-(SO<sub>3</sub>)Methyl-COOH-c[RGDyK]; in blue). Counterstainings were used to highlight the nuclei (white) and lysosomes (green). The overlay shows the localization of staining in the cells.

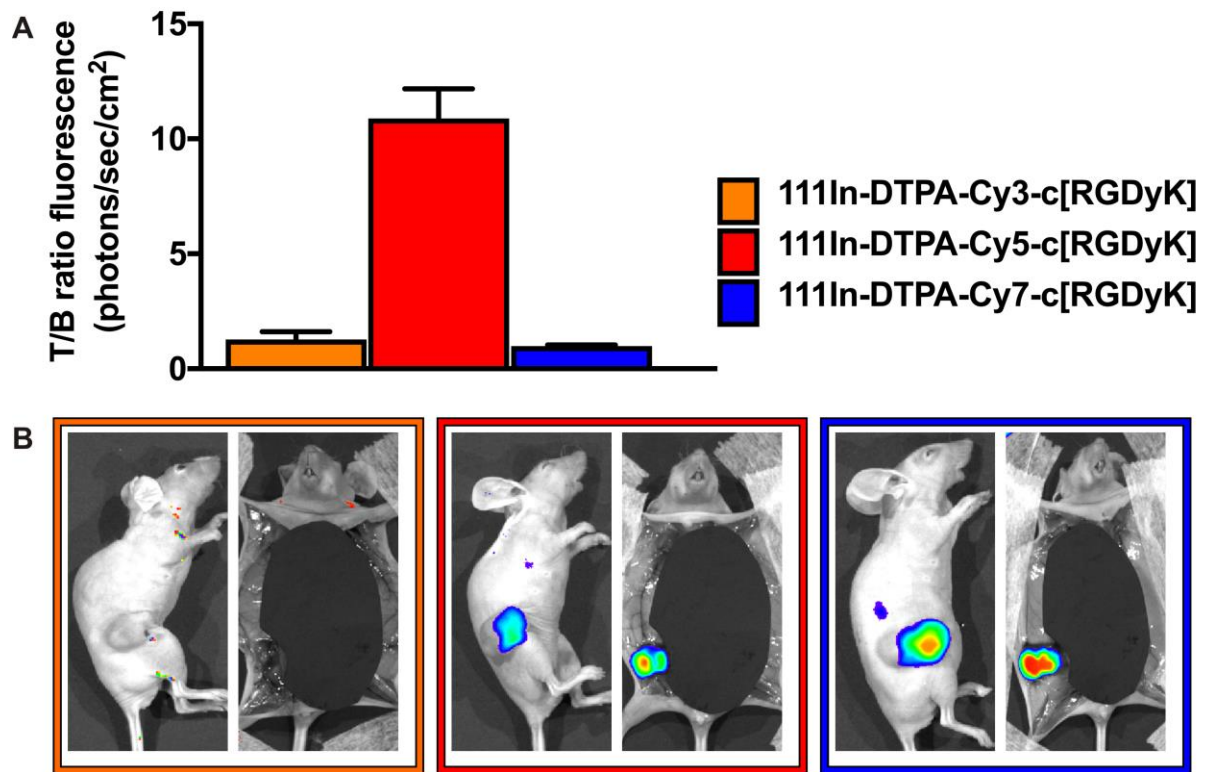

**Supplemental Fig. 9. In vivo fluorescence-based tumor-to-background ratios.** A) Analysis of the tumor-to-background (T/B) ratio of <sup>111</sup>In-DTPA-Cy3-c[RGDyK] (orange), <sup>111</sup>In-DTPA-Cy5-c[RGDyK] (red) and <sup>111</sup>In-DTPA-Cy7-c[RGDyK] (blue) based on fluorescence intensity signals (photons/sec/cm<sup>2</sup>) with B) corresponding fluorescence images obtained using an IVIS Spectrum.

**Supplemental Table 2. Relative scoring of DTPA-Cy3-(SO<sub>3</sub>)Methyl-COOH-c[RGDyK] to previously reported hybrid c[RGDyK] analogues studied under identical conditions.**

| Cy7 versus c[RGDyK] Dyes FINAL                                       | Blood | Brain | Lungs | Heart | Liver | Kidneys | Spleen | Stomach | Intestines | Tumor | Muscle (paw) | Fat (neck) | Mammary gland | Tumor:muscle | Tumor:Fat (neck) |
|----------------------------------------------------------------------|-------|-------|-------|-------|-------|---------|--------|---------|------------|-------|--------------|------------|---------------|--------------|------------------|
| DTPA-Ac-c[RGDyK]                                                     | 0.427 | 0.341 | 0.469 | 0.422 | 0.844 | 0.382   | 0.569  | 0.411   | 0.636      | 0.418 | 0.338        | 0.533      | 0.355         | 1.148        | 0.798            |
| DTPA-c[RGDyK]                                                        | 0.461 | 0.435 | 0.620 | 0.639 | 0.874 | 0.401   | 0.624  | 0.711   | 0.789      | 0.496 | 0.508        | 0.669      | 0.429         | 0.937        | 0.721            |
| DTPA-Cy5-Sulfonate-COOH-c[RGDyK]                                     | 0.929 | 0.901 | 1.430 | 1.344 | 1.166 | 1.455   | 1.244  | 1.075   | 1.253      | 1.025 | 1.004        | 1.073      | 0.701         | 0.948        | 0.912            |
| DTPA-Cy5-Methyl-COOH-c[RGDyK]                                        | 1.182 | 0.892 | 2.010 | 2.182 | 3.402 | 1.416   | 1.754  | 1.448   | 1.979      | 1.195 | 1.180        | 1.803      | 0.997         | 0.950        | 0.642            |
| DTPA-Cy5-QAmine-COOH-c[RGDyK]                                        | 0.499 | 0.502 | 1.041 | 0.933 | 4.344 | 0.906   | 0.989  | 0.940   | 0.847      | 0.755 | 0.657        | 0.799      | 0.559         | 1.069        | 0.895            |
| DTPA-Cy5-(SO <sub>3</sub> )Sulfonate-COOH-c[RGDyK]                   | 0.470 | 0.333 | 0.716 | 0.665 | 0.521 | 1.364   | 0.609  | 0.634   | 0.530      | 0.604 | 0.430        | 0.555      | 0.337         | 1.372        | 1.082            |
| DTPA-Cy5-(SO <sub>3</sub> )Methyl-COOH-c[RGDyK]                      | 0.520 | 0.246 | 0.515 | 0.406 | 0.385 | 0.513   | 0.329  | 0.559   | 0.462      | 0.640 | 0.321        | 0.346      | 0.202         | 1.912        | 1.890            |
| DTPA-Cy5-(SO <sub>3</sub> )QAmine-COOH-c[RGDyK]                      | 0.483 | 0.291 | 0.582 | 0.599 | 0.674 | 0.754   | 0.603  | 0.554   | 0.577      | 0.596 | 0.413        | 0.580      | 0.319         | 1.377        | 0.977            |
| DTPA-Cy5-(SO <sub>3</sub> )Sulfonate-(SO <sub>3</sub> )COOH-c[RGDyK] | 0.323 | 0.330 | 0.765 | 0.737 | 1.009 | 1.726   | 0.697  | 0.626   | 0.749      | 0.543 | 0.418        | 0.487      | 0.353         | 1.259        | 1.075            |
| DTPA-Cy5-(SO <sub>3</sub> )Methyl-(SO <sub>3</sub> )COOH-c[RGDyK]    | 0.425 | 0.353 | 0.754 | 0.724 | 1.194 | 0.941   | 0.711  | 0.719   | 0.785      | 0.568 | 0.599        | 0.598      | 0.391         | 0.940        | 0.997            |
| DTPA-Cy5-(SO <sub>3</sub> )QAmine-(SO <sub>3</sub> )COOH-c[RGDyK]    | 0.323 | 2.567 | 0.517 | 1.223 | 1.670 | 0.844   | 0.541  | 0.615   | 0.909      | 0.312 | 0.405        | 0.427      | 0.669         | 0.983        | 0.813            |
| DTPA-Cy3-(SO <sub>3</sub> )Methyl-COOH-c[RGDyK]                      | 1.000 | 1.000 | 1.000 | 1.000 | 1.000 | 1.000   | 1.000  | 1.000   | 1.000      | 1.000 | 1.000        | 1.000      | 1.000         | 1.000        | 1.000            |
| DTPA-Cy7-(SO <sub>3</sub> )Methyl-COOH-c[RGDyK]                      | 1.883 | 1.153 | 1.860 | 2.208 | 3.097 | 2.766   | 2.068  | 1.710   | 1.907      | 1.881 | 2.194        | 1.872      | 2.910         | 0.921        | 1.008            |

Favorable significant differences ( $p \leq 0.05$ ) in uptake were colored green, unfavorable significant changes were noted in red. Insignificant differences ( $p > 0.05$ ) from <sup>111</sup>In-DTPA-Cy5-(SO<sub>3</sub>)Methyl-COOH-c[RGDyK] were left uncolored.

**Supplemental Table 3. Relative scoring of DTPA-Cy7-(SO<sub>3</sub>)Methyl-COOH-c[RGDyK] to previously reported hybrid c[RGDyK] analogues studied under identical conditions .**

| Cy7 versus c[RGDyK] Dyes FINAL                                       | Blood | Brain | Lungs | Heart | Liver | Kidneys | Spleen | Stomach | Intestines | Tumor | Muscle (paw) | Fat (neck) | Mammary gland | Tumor:muscle | Tumor:Fat (neck) |
|----------------------------------------------------------------------|-------|-------|-------|-------|-------|---------|--------|---------|------------|-------|--------------|------------|---------------|--------------|------------------|
| DTPA-Ac-c[RGDyK]                                                     | 0.227 | 0.296 | 0.252 | 0.191 | 0.273 | 0.138   | 0.275  | 0.240   | 0.333      | 0.222 | 0.154        | 0.285      | 0.122         | 1.247        | 0.792            |
| DTPA-c[RGDyK]                                                        | 0.245 | 0.377 | 0.333 | 0.290 | 0.282 | 0.145   | 0.302  | 0.416   | 0.414      | 0.264 | 0.231        | 0.357      | 0.148         | 1.017        | 0.715            |
| DTPA-Cy5-Sulfonate-COOH-c[RGDyK]                                     | 0.493 | 0.781 | 0.768 | 0.609 | 0.377 | 0.526   | 0.601  | 0.629   | 0.657      | 0.545 | 0.457        | 0.573      | 0.241         | 1.029        | 0.904            |
| DTPA-Cy5-Methyl-COOH-c[RGDyK]                                        | 0.628 | 0.774 | 1.081 | 0.988 | 2.713 | 0.512   | 0.848  | 0.847   | 1.037      | 0.635 | 0.538        | 0.963      | 0.343         | 1.032        | 0.636            |
| DTPA-Cy5-QAmine-COOH-c[RGDyK]                                        | 0.265 | 0.435 | 0.560 | 0.423 | 1.403 | 0.327   | 0.478  | 0.550   | 0.444      | 0.402 | 0.300        | 0.427      | 0.192         | 1.161        | 0.888            |
| DTPA-Cy5-(SO <sub>3</sub> )Sulfonate-COOH-c[RGDyK]                   | 0.250 | 0.288 | 0.385 | 0.301 | 0.168 | 0.493   | 0.294  | 0.371   | 0.278      | 0.321 | 0.196        | 0.296      | 0.116         | 1.489        | 1.074            |
| DTPA-Cy5-(SO <sub>3</sub> )Methyl-COOH-c[RGDyK]                      | 0.276 | 0.214 | 0.277 | 0.184 | 0.124 | 0.186   | 0.159  | 0.327   | 0.242      | 0.340 | 0.146        | 0.185      | 0.069         | 2.075        | 1.875            |
| DTPA-Cy5-(SO <sub>3</sub> )QAmine-COOH-c[RGDyK]                      | 0.256 | 0.253 | 0.313 | 0.271 | 0.218 | 0.273   | 0.292  | 0.324   | 0.303      | 0.317 | 0.188        | 0.310      | 0.110         | 1.495        | 0.969            |
| DTPA-Cy5-(SO <sub>3</sub> )Sulfonate-(SO <sub>3</sub> )COOH-c[RGDyK] | 0.171 | 0.286 | 0.411 | 0.334 | 0.326 | 0.624   | 0.337  | 0.366   | 0.393      | 0.288 | 0.190        | 0.260      | 0.121         | 1.366        | 1.067            |
| DTPA-Cy5-(SO <sub>3</sub> )Methyl-(SO <sub>3</sub> )COOH-c[RGDyK]    | 0.225 | 0.306 | 0.405 | 0.328 | 0.385 | 0.340   | 0.344  | 0.420   | 0.412      | 0.302 | 0.273        | 0.319      | 0.134         | 1.020        | 0.989            |
| DTPA-Cy5-(SO <sub>3</sub> )QAmine-(SO <sub>3</sub> )COOH-c[RGDyK]    | 0.171 | 2.225 | 0.278 | 0.554 | 0.539 | 0.233   | 0.262  | 0.360   | 0.477      | 0.166 | 0.184        | 0.228      | 0.230         | 1.068        | 0.807            |
| DTPA-Cy3-(SO <sub>3</sub> )Methyl-COOH-c[RGDyK]                      | 0.531 | 0.867 | 0.538 | 0.453 | 0.323 | 0.362   | 0.484  | 0.585   | 0.524      | 0.532 | 0.456        | 0.534      | 0.344         | 1.086        | 0.992            |
| DTPA-Cy7-(SO <sub>3</sub> )Methyl-COOH-c[RGDyK]                      | 1.000 | 1.000 | 1.000 | 1.000 | 1.000 | 1.000   | 1.000  | 1.000   | 1.000      | 1.000 | 1.000        | 1.000      | 1.000         | 1.000        | 1.000            |

Favorable significant differences ( $p \leq 0.05$ ) in uptake were colored green, unfavorable significant changes were noted in red. Insignificant differences ( $p > 0.05$ ) from <sup>111</sup>In-DTPA-Cy5-(SO<sub>3</sub>)Methyl-COOH-c[RGDyK] were left uncolored.
